# Supplementary material
Source: publisher site journal article supplement (https://www.dovepress.com/article/187973)
Supplement: Supplementary file 1 [file get_supplementary_file.php]

**Supplementary** **Table S1** All primers used in this study**.**

| **Name** | **Primer Sequence** |
| --- | --- |
| β-actin F | 5’- CCATCGTCCACCGCAAAT -3’ |
| β-actin R | 5’- TGTCACCTTCACCGTTCCAGT -3’ |
| lncRNA1308 F | 5’- GCCTTCTCTCCCTCAGTCTC -3’ |
| lncRNA1308 R | 5’- GTCAGAGGTAGAGCGAGGAC -3’ |
| lncRNA1308 (Luci) F | 5’-AAACTAGT TGGTGTTCCCCAGCACCAGTGCG -3’ |
| lncRNA1308 (Luci) R | 5’-GGAAGCTTAACGCTCCCAAGATGTCACGTTTATTGC -3’ |
| ADAM 15(Luci) F | 5’-AAACTAGTCCTCTCCGGAGGTTCCGCTGCCT -3’ |
| ADAM 15(Luci) R | 5’-GGAAGCTTGAACGCTCCCAAGATGTCACGTTTATTGC -3’ |
| lncRNA1308 (pGL3) F | 5’-AAAGGTACCTGGTGTTCCCCAGCACCAGTGCG -3’ |
| lncRNA1308 (pGL3) R | 5’-AAACTCGAGAACGCTCCCAAGATGTCACGTTTATTGC -3’ |

**Abbreviations**: lncRNA, long non-coding RNA; F, forward primer; R, reverse primer; Luci, luciferase reporter.

**Supplementary** **Table S2** All probes used in this study.

| **Name** | **Primer Sequence (biotin-5’-3’)** |
| --- | --- |
| lncRNA 1308 probe1 | CCCCCAACGCACTGGTGCTG |
| lncRNA 1308 probe2 | GGGAGAGAAGGCAGGAGGCC |
| lncRNA 1308 probe3 | CAGGCAGTGGCTTCCTTGGG |
| lncRNA 1308 probe4 | AGCCCCTGGGCCGGGCAGGT |
| lncRNA 1308 probe5 | GTCGGAGGCGGTGGCGCTGG |
| lncRNA 1308 probe6 | CTTGGAGGCAGCGGAACCTC |
| lncRNA 1308 probe7 | TGGTAGGGGACTCCAGAGGG |
| lncRNA 1308 probe8 | GGCGGTGCCCGGAGTCTTAA |
| lncRNA 1308 probe9 | CCCGCTGCAACTACGCCGGC |
| lncRNA 1308 probe10 | CTGTGCGGACCTTCCTCAAT |
| Ctrl probe | GCTATGAAGAGATACATTAA |

**Abbreviations**: lncRNA, long non-coding RNA; Ctrl probe, control probe.
